# Supplementary material for: The prevalence of stroke and depression and factors associated with depression in elderly people with and without stroke
Source: Springer Nature journal article supplement (doi:10.1186/s12877-016-0347-6), 2016-10-07
Supplement: MOESM1 [file 10831984]

## Survey questions

"Have you had a stroke?"

Yes

No

"Are you basically satisfied with your life?"

Yes

No

"Do you feel that life is empty?"

Yes

No

"Are you afraid that something bad is going to happen?"

Yes

No

"Do you feel happy most of the time?"

Yes

No

"Do you feel depressed?"

Yes

No

"Have you had a myocardial infarction?"

Yes

No

"Have you had any kind of cancer?"

Yes

No

"Do you have diabetes?"

Yes

No

"Do you shower without human assistance?"

Yes

No

"Do you clean your residence by yourself, without human assistance?"

Yes

No

"Do you buy your own groceries without human assistance?"

Yes

No

"Do you utilize public transportation without human assistance?"

Yes

No

"Do you cook your own food without human assistance?"

Yes

No

"Are you able to read the text in a newspaper?"

Yes, without glasses

Yes, with glasse

Yes, with some other vision aids

No

"Are you able to hear what someone tells you in a normal tone of voice from a distance of about 1 meter?"

Yes

Yes, with a hearing aid

No

"Has your weight decreased in the last three months?"

Yes, more than 3 kg

Yes, between 1 and 3 kg

Don't know

No, no weight loss

"Do you live together with someone?"

Yes, with a husband/wife/partner

Yes, with a sibling

Yes, with children

Yes, with grandchildren

Yes, with another relative

Yes, with someone else, who? (free text)

No, I live alone

No, I am living with someone, but not in the same residence

"Do you have someone you can talk to about anything, someone you can share your concerns as well as your joys with?"

Yes, a husband/wife/partner/"partner living apart together"

Yes, children

Yes, grandchildren

Yes, other relative

Yes, friends

Yes, neighbors

Yes, home care services personel

Yes, a district nurse/health care professional

Yes, someone else, who? (free text)

No, no one

What is your educational background? Note the highest education level:

Less than 6 years "folkskola" (type of elementary school)

"Folkskola", "mellanskola" (9 years maximum) (type of elementary school)

Girls' school

Folk High school

Vocational school

High school diploma

University education

“Do you make ends meet?”

It is very difficult

It is pretty difficult

With some difficulty

Without any difficulty

“Have you had any aches or pain in the last week?”

Yes

No

“Have you experienced something that you would describe as a life crisis the last year (12 months)?”

Yes, personal illness

Yes, illness in relatives

Yes, death in the family, whose? (free text)

Yes, death in circle of friends

Yes, separation/divorce, whose? (free text)

Yes, other family issues, whose? (free text)

Yes, moving to another city

Yes, worsening economic state

Yes, something else, what? (free text)

No, there have been no such changes
